## Repetition suppression and prediction error

1 **Running head:** Repetition suppression and prediction error

2

3

4 **Prediction Error and Repetition Suppression Have Distinct**

5 **Effects on Neural Representations of Visual Information**

6

7 **Matthew F. Tang<sup>1,2</sup>, Cooper A. Smout<sup>1,2</sup>, Ehsan Arabzadeh<sup>2,3</sup> & Jason B.**

8 **Mattingley<sup>1,2,4</sup>**

9

10 1. Queensland Brain Institute, The University of Queensland, St Lucia, QLD,  
11 Australia

12 2. Australian Research Council Centre of Excellence for Integrative Brain  
13 Function, Victoria, Australia

14 3. Eccles Institute of Neuroscience, John Curtin School of Medical Research, The  
15 Australian National University, Canberra, ACT, Australia

16 4. School of Psychology, The University of Queensland, St Lucia, QLD, Australia

17

18

19 **Corresponding author**

20 Matthew F. Tang

21 Queensland Brain Institute

22 The University of Queensland

23 St Lucia, QLD, Australia

24 Email: [m.tang1@uq.edu.au](mailto:m.tang1@uq.edu.au)

## Repetition suppression and prediction error

### 25 **Abstract**

26 Predictive coding theories argue recent experience establishes expectations in the  
27 brain that when violated generate *prediction errors*. Prediction errors provides a  
28 possible explanation for *repetition suppression* where repeated stimulus  
29 presentations yield reduced neural responses. On a predictive coding account,  
30 repetition suppression arises because the repeated stimuli are expected whereas  
31 non-repeated stimuli are unexpected, eliciting larger neural responses. Here we  
32 employed electroencephalography in human to test the predictive coding account of  
33 repetition suppression. In different blocks, streams of gratings were presented whose  
34 orientations were expected either to repeat or change. Uniquely, we applied  
35 multivariate forward modelling to determine how orientation selectivity was affected  
36 by repetition and prediction. Prediction errors were associated with significantly  
37 enhanced orientation selectivity, whereas there was no such influence on selectivity  
38 during repetition suppression. Our findings also suggest that when a prediction error  
39 is registered in the visual system, representations of expected stimulus features are  
40 transiently reactivated.

41

## Repetition suppression and prediction error

### 42 Introduction

43 At any moment in time, the brain receives more sensory information than can  
44 be responded to, creating the need for selection and efficient processing of the  
45 incoming signals. One mechanism by which the brain reduces its information  
46 processing load is to encode successive presentations of the same stimulus in a  
47 more efficient form, a process known as neural adaptation. Such adaptation has  
48 been observed across different sensory modalities and species, and provides a  
49 mechanism to enhance the coding efficiency of individual neurons and neuronal  
50 populations (Maravall et al., 2007; Barlow, 2012; Benucci et al., 2013; Adibi et al.,  
51 2013b). A specific form of neuronal adaptation is known as repetition suppression, in  
52 which the neural responses evoked by a given stimulus decline with repeated  
53 exposure to that stimulus (Gross et al., 1967; Movshon and Lennie, 1979; Diederer  
54 et al., 2016; Keller et al., 2017; Rasmussen et al., 2017). Here we asked whether a  
55 predictive coding theory can account for the changes in neural representations  
56 observed with repetition suppression.

57 The phenomenon of repetition suppression has been widely exploited to  
58 investigate neural representations of sensory information. Repeated exposures allow  
59 for more efficient representation of subsequent stimuli, as manifested in improved  
60 behavioural performance despite a significant reduction in neural activity (Schacter  
61 and Buckner, 1998; Henson and Rugg, 2003). Repetition suppression paradigms  
62 have been used extensively in human neuroimaging because they are commonly  
63 believed to be analogous to the single-cell adaptation effects observed in animal  
64 studies (see Barron et al., 2016 for review). The exact relationship between the  
65 effects seen in human neuroimaging studies and animal neurophysiology has,

## Repetition suppression and prediction error

66 however, yet to be fully established.

67         The view that repetition suppression measured in human neuroimaging  
68 reflects neuronal adaptation has recently been challenged by hierarchical predictive  
69 coding theories (Summerfield et al., 2008; Auksztulewicz and Friston, 2016). These  
70 theories argue that the brain interprets incoming sensory events based on what  
71 would be expected from the recent history of exposure to such stimuli (Rao and  
72 Ballard, 1999; Friston, 2005). Predictions are generated within each cortical area,  
73 and are bi-directionally propagated from higher to lower areas, including to primary  
74 sensory regions, allowing for more efficient representation of expected stimuli. When  
75 there is a precise expectation, incoming information can be efficiently represented by  
76 recruiting a small pool of relevant neurons (Friston, 2005). Some of the most  
77 compelling evidence for predictive coding comes from human neuroimaging  
78 experiments in which the presentation of an unexpected stimulus generates a larger  
79 response than the presentation of an expected stimulus. In studies employing  
80 electroencephalography (EEG) and magnetoencephalography (MEG), this effect is  
81 known as the *mismatch negativity* (Näätänen et al., 2007; Garrido et al., 2009;  
82 Wacongne et al., 2011).

83         To test the hypothesis that prediction error can account for repetition  
84 suppression effects, Summerfield and colleagues (2008) introduced an experimental  
85 paradigm in which the identity of a face stimulus was either repeated in 80% of trials  
86 (making the repetition *expected*) or was changed in 80% of trials (making the  
87 repetition *unexpected*). There was a greater reduction of the BOLD response in  
88 fusiform face area when a face repetition was expected, compared to when it was  
89 unexpected. This attenuation of repetition suppression by prediction has also been

## Repetition suppression and prediction error

90 replicated using fMRI (Larsson and Smith, 2012) and M/EEG, using high-level stimuli  
91 such as faces (Summerfield et al., 2011), and simple stimuli such as tones  
92 (Todorovic et al., 2011; Todorovic and de Lange, 2012).

93         A potential reconciliation of the relationship between prediction error and  
94 repetition suppression comes from work showing that while expectations decrease  
95 the overall amount of neural activity, they may also yield sharper representations of  
96 sensory stimuli (Kok et al., 2012). Typical neuroimaging analyses only examine  
97 overall levels of activity (Tootell et al., 1995; Buckner et al., 1998; Tootell et al., 1998;  
98 Kourtzi and Kanwisher, 2001), which could be produced by several different types of  
99 change in neural representation. For instance, both sharpening, where response to  
100 only unpredicted features is suppressed, and gain reduction, where a multiplicative  
101 suppression occurs for all features, could be associated with decreased population  
102 activity, even though the amount of information carried by the representations will be  
103 markedly different. Recently introduced multivariate pattern analytic approaches to  
104 human neuroimaging, such as forward encoding modelling, allow quantification of  
105 stimulus-selective information contained within patterns of neural activity in human  
106 observers (Brouwer and Heeger, 2009; Garcia et al., 2013; Myers et al., 2015; Salti  
107 et al., 2015; King et al., 2016; Wolff et al., 2017).

108         Here we used multivariate methods to determine whether repetition  
109 suppression and prediction error similarly affect the way the brain represents visual  
110 orientation information. To anticipate our findings, we found that repetition  
111 suppression had no effect on visual orientation selectivity, but that prediction error  
112 was associated with a significantly increased orientation-selective response through  
113 a gain modulation soon after the stimulus was presented. This representation was

## Repetition suppression and prediction error

114 then transiently re-activated ~200 ms afterwards.

## 115 **Results**

116 We used a modified version of the paradigm introduced by Summerfield and  
117 colleagues (2008), replacing the face stimuli used in that study with oriented Gabors.  
118 These low-level stimuli allowed us to quantify the degree of orientation selectivity in  
119 EEG activity to determine how representations of orientation are affected by  
120 prediction error and repetition suppression. Each of fifteen observers participated in  
121 two EEG sessions where on each trial, two Gabors were presented sequentially (100  
122 ms presentation, 600 ms stimulus onset asynchrony), and these stimulus pairs either  
123 repeated or alternated in their orientation (Figure 1A, Movie 1). The predictability of  
124 the repeated and alternating pairs was varied in a block-wise manner to manipulate  
125 expectation. In a *repeating* block, the orientations of the two Gabors in a pair  
126 repeated in 80% of trials, and alternated for the remaining 20%. These contingencies  
127 were reversed in the *alternating* block (Figure 1B). The orientations of successive  
128 stimuli across a block were randomized to limit any accumulated effects of  
129 adaptation and prediction. As repetition suppression and prediction error form  
130 orthogonal dimensions of the task, the design allowed us to isolate their respective  
131 contributions to neural responses. Participants completed an unrelated task of  
132 discriminating (red vs blue) rare (10%) coloured Gabors.

## Repetition suppression and prediction error

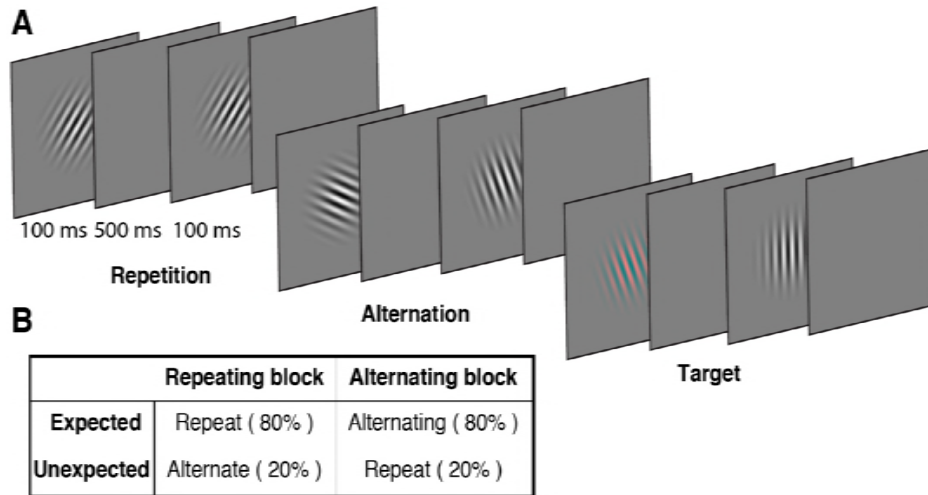

133

134 **Figure 1.** Example stimulus displays and task design. **(A)** Schematic of the stimuli  
135 and timing used in the experiment. Participants viewed a rapid stream of pairs of  
136 Gabors and monitored for an infrequently occurring coloured target (10% of trials).  
137 The stimulus orientations varied pseudorandomly across trials between 0° and 160°  
138 (in 20° steps), allowing orientation-selective information contained within patterns of  
139 EEG activity to be estimated. **(B)** The orientation of the pairs of Gabors could either  
140 repeat or alternate. In one type of block, 80% of trials were orientation repeats and  
141 the remaining 20% alternated (Repeating blocks); in the other type of block these  
142 contingencies were reversed (Alternating blocks).

143

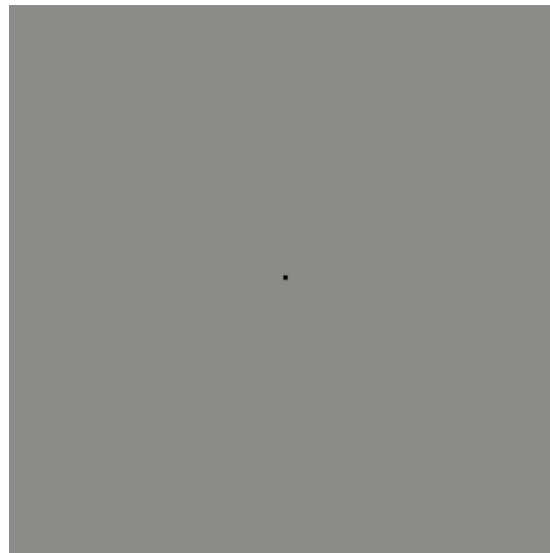

144

145 **Movie 1.** Example of the stimulus sequence in a typical repetition block.

146

147 **Repetition suppression and prediction error affect the overall level of neural**  
148 **activity**

149 The Gabors elicited a large response over occipital-parietal areas (Figure 2A).

## Repetition suppression and prediction error

150 Consistent with previous work (Tootell et al., 1998; Summerfield et al., 2011;  
151 Todorovic et al., 2011; Rentzeperis et al., 2012; Todorovic and de Lange, 2012; Cui  
152 et al., 2016; Keller et al., 2017), there was a significant repetition suppression effect  
153 (Repeat < Alternating), such that the response to repeated stimuli was significantly  
154 reduced compared with the response to alternating stimuli (Figure 2A). The repetition  
155 suppression effect was evident over a large cluster of occipital-parietal electrodes at  
156 two time intervals: an early effect from 79 to 230 ms, and a later effect at 250 to 540  
157 ms after the onset of the second stimulus (cluster  $p < .025$ ; Figure 2B and caption). A  
158 large cluster of frontal electrodes mirrored the repetition suppression effect with a  
159 similar time course: the ERP over these frontal sites had the same pattern, but was  
160 reversed in sign, suggesting it originated from the same dipole as the occipital  
161 response.  
162



## Repetition suppression and prediction error

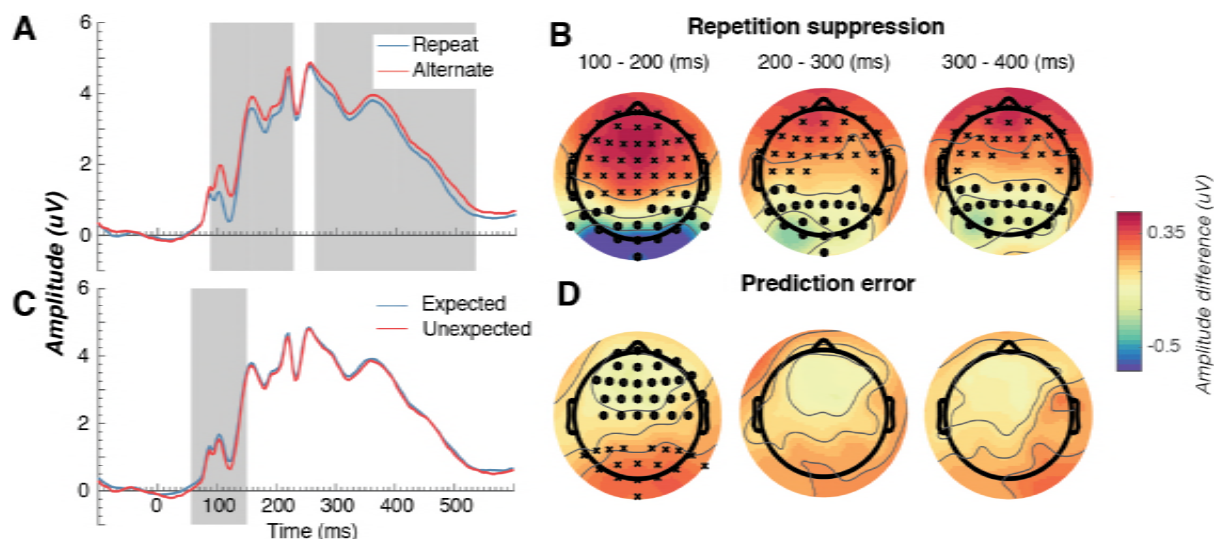

163

164 **Figure 2.** Univariate EEG results for the effect of repetition suppression and  
165 prediction error on the second stimulus in a pair (T2). Grand average ERP time  
166 courses for repetition suppression (**A**) and prediction error (**C**) averaged over  
167 occipital-parietal electrodes (O1, O2, Oz, POz, PO7, PO3, PO8, PO4). The shaded  
168 region indicates significant differences between the conditions (two-tailed cluster-  
169 permutation, alpha  $p < .05$ , cluster alpha  $p < .05$ , N permutations = 20,000). The  
170 main effects of repetition suppression (**B**) and prediction error (**D**) over three time  
171 periods and across all electrodes. The main effect of repetition suppression is  
172 displayed as Repeating minus Alternating trials. The main effect of prediction error is  
173 displayed as Expected minus Unexpected. Circles indicate clusters of electrodes  
174 with significantly reduced activity, and crosses indicate clusters of electrodes with  
175 significantly increased activity (alpha  $p < .05$ , cluster  $p < .025$ , N permutations =  
176 1500).

177

178 Also consistent with previous results (Garrido et al., 2009; Summerfield et al.,

179 2011; Todorovic et al., 2011; Todorovic and de Lange, 2012), there was a significant

180 prediction error effect (Expected < Unexpected), with a larger neural response over a

181 cluster of frontal electrodes 75-150 ms after stimulus presentation (Figure 2C). As

182 with the repetition suppression result described above, there was a prediction error

183 effect of opposite polarity over occipital-parietal electrodes. This effect was

184 significant at an early time point post-stimulus (79-130 ms), but not at later time

185 points (320-390 ms; Figure 2D). Finally, there was no interaction between repetition

186 suppression and prediction error (no significant positive or negative clusters, all  $p >$

## Repetition suppression and prediction error

187 .05). Taken together, these results reveal both repetition suppression and prediction  
188 error effects in the neural data, which were indexed separately as shown in Figure 2.

### 189 **Prediction errors increase the amount of orientation-selective information** 190 **contained within patterns of EEG activity**

191 We next examined the key question of whether repetition suppression and  
192 prediction error differentially affect the neural representation of orientation  
193 information. To do this, we used a forward encoding approach to reconstruct  
194 orientation-selective information contained within the multivariate pattern of EEG  
195 activity distributed across the scalp (see Methods for details). Briefly, this technique  
196 transforms sensor-level responses into tuned ‘feature’ channels (Kay et al., 2008;  
197 Brouwer and Heeger, 2009; Garcia et al., 2013; Myers et al., 2015), in this case,  
198 orientation-selective features. For each trial, the presented orientation was  
199 convolved with a canonical, orientation-selective tuning function and regressed  
200 against the pattern of EEG activity across all sensors at each time point. This  
201 created a spatial filter of the multivariate EEG activity that differentiated orientations  
202 (Figure 3D). These weights were then inverted to reconstruct the model, and  
203 multiplied against an independent set of test trials to produce responses in the  
204 modelled orientation channels. These sets of responses were then used to evaluate  
205 the degree of orientation selectivity in those trials. The procedure was repeated for  
206 all time points in the trial, and a cross-validated approach was used until all trials had  
207 been used for both training and testing.

208 As shown in Figure 3, the forward encoding revealed a strong, orientation-  
209 selective response derived from the multivariate pattern of EEG activity. This  
210 orientation-tuned response was evident from ~50 to 470 ms after stimulus onset, and

## Repetition suppression and prediction error

211 peaked between ~120-250 ms (Figure 3C). Examination of the regression weights

212 revealed that this response was largely driven by activity centred over occipital-

213 parietal areas (Figure 3D).

214

215

## Repetition suppression and prediction error

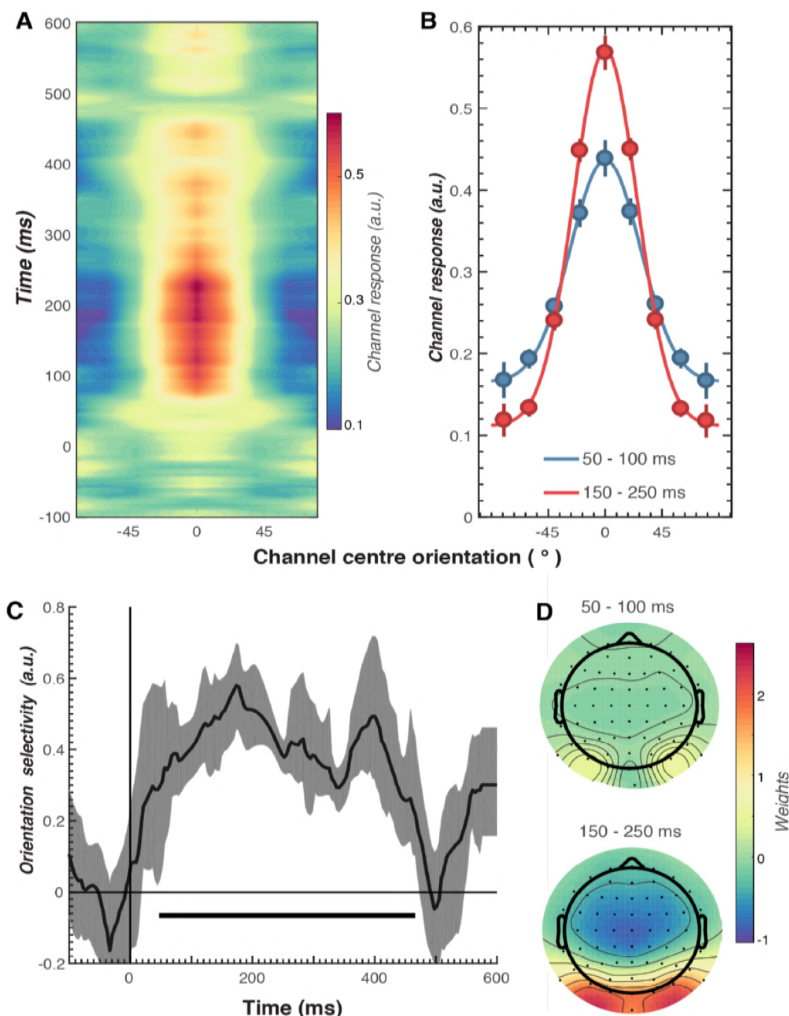

216

217 **Figure 3.** Results of the forward encoding modelling for orientation-selectivity. (A)  
218 Time-resolved orientation tuning curve across all participants and conditions in  
219 response to the second Gabor. The forward encoding approach resulted in a tuning  
220 curve for each of the nine presented orientations. These tuning curves were then  
221 centred at each presented orientation (here labelled as 0°) to combine across all  
222 orientations. The orientation-selective response is contained within the overall  
223 pattern of EEG; activity begins soon after stimulus onset and peaks at around 250  
224 ms before declining. (B) Population tuning curve of the stimulus reconstruction  
225 across participants, averaged between 50-100 ms and 150-250 ms after stimulus  
226 presentation. Each line is a fitted Gaussian response with a variable offset used to  
227 quantify orientation selectivity. Error bars indicate  $\pm 1$  standard error of mean across  
228 participants. (C) Amplitude of the channel response over time, averaged across all  
229 conditions (black line). The thick black line indicates significant encoding of  
230 orientation based on a cluster-permutation test across participants (cluster  $p < .05$ , N  
231 permutations = 20,000). Encoding accuracy was reliable from 52 to 470 ms post-  
232 stimulus onset. The error shading (dark grey) indicate bootstrapped 95% confidence  
233 intervals of the mean. (D) Topographic plots of the weights (averaged across the 9  
234 orientation channels) derived from forward encoding at the corresponding time points  
235 shown in panel B.

## Repetition suppression and prediction error

236 To examine our central question of whether repetition suppression and  
237 prediction error have differential effects on neural representations of orientation, we  
238 split and averaged the results of the forward encoding by trial type, and fitted these  
239 with Gaussians (see Methods) to quantify orientation selectivity (Figure 4). Repetition  
240 suppression did not affect the amount of orientation selectivity contained within the  
241 EEG data, as trials with repeated and alternating orientations could be decoded with  
242 similar accuracies. This was the case even though the repeated trials had a  
243 markedly smaller EEG response over occipital and parietal electrodes, where the  
244 forward encoding model was maximally sensitive (Figure 2A). This result is  
245 consistent with the ‘efficient representation’ hypothesis of repetition suppression,  
246 which argues that the overall neural response is smaller with repetition suppression  
247 due to more efficient coding of stimulus information (Gotts et al., 2012).  
248

## Repetition suppression and prediction error

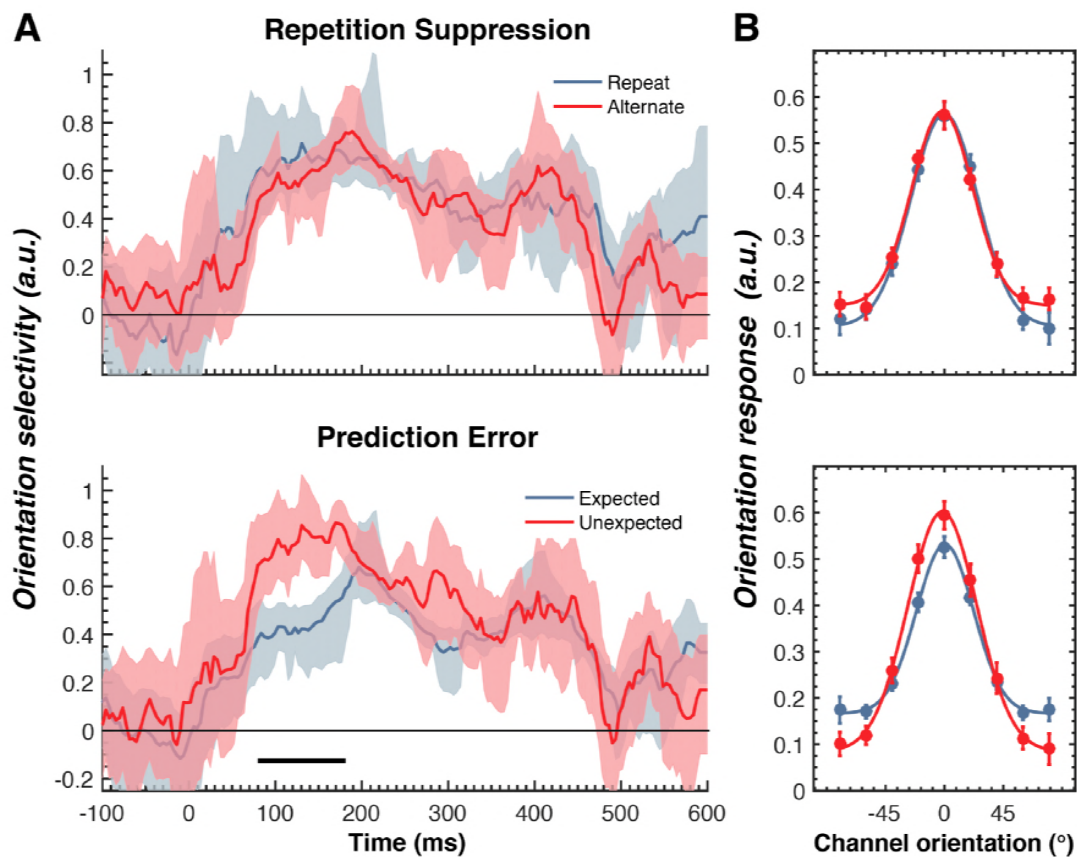

249

250 **Figure 4.** The effect of repetition suppression and prediction error on orientation  
251 selectivity measured using forward encoding modelling. **(A).** Amount of orientation-  
252 selective information reconstructed from the EEG signal in response to the second  
253 Gabor in a pair, shown separately for repetition suppression (upper panel) and  
254 prediction error (lower panel). The thick black line indicates significant differences  
255 between the conditions (two-tailed cluster-permutation, alpha  $p < .05$ , cluster alpha  $p$   
256  $< .05$ , N permutations = 20,000). Error shading indicates bootstrapped 95%  
257 confidence intervals of the mean. **(B)** The population tuning curve averaged over the  
258 significant time period (79 – 185 ms) to show how the overall stimulus representation  
259 is affected with a fitted Gaussian. For prediction error, the amplitude increased and  
260 the baseline decreased. There was no effect for the repetition suppression condition.  
261 Error bars indicate  $\pm 1$  standard error.

262

263

Examining the effect of prediction error revealed a markedly different pattern

264

of results. At 79 - 185 ms after the onset of the second stimulus in the pair,

265

orientation-selectivity increased significantly when the stimulus was unexpected

266

relative to when it was expected, i.e., the prediction error was associated with an

267

increased representation of the stimulus at the earliest stages of the brain's

## Repetition suppression and prediction error

268 response to that stimulus. Moreover, the prediction error signal contained enhanced  
269 information about the specific features of the stimulus that violated expectation, in  
270 this case the orientation of the second grating.

271 To determine how the orientation representation was affected by prediction  
272 error, we averaged the stimulus reconstruction over this early time period (79-185  
273 ms after stimulus presentation) to increase signal-to-noise, and fitted Gaussians to  
274 each participant's data individually (Figure 3B). This again showed that the amplitude  
275 of the response was significantly ( $t(14) = 3.34$ ,  $p = .0049$ ) higher for unexpected  
276 ( $M = 0.67$ ,  $SE = 0.06$ ) than for expected ( $M = 0.41$ ,  $SE = 0.03$ ) stimuli. By contrast,  
277 the width of the representations was similar for unexpected ( $M = 29.62^\circ$ ,  $SE = 4.72^\circ$ )  
278 and expected ( $M = 26.72^\circ$ ,  $SE = 2.74^\circ$ ) stimuli, paired t-test ( $t(14) = 0.78$ ,  $p = .45$ ).  
279 There was also a small, but non-significant ( $t(14) = 1.94$ ,  $p = .072$ ) trend for a smaller  
280 baseline response (i.e., non-orientation tuned activity) in the unexpected ( $M = -0.01$ ,  
281  $SE = 0.07$ ) than in the expected ( $M = 0.13$ ,  $SE = 0.02$ ) condition. For comparison, we  
282 also averaged the same time period for the repetition suppression conditions, and  
283 found similar curves for the repeated and alternating trials (*all ps* > .05).

284 To further examine whether orientation-selectivity contained within the overall  
285 pattern of EEG activity differed for unexpected and expected stimuli, we used  
286 multivariate linear discriminant analysis to determine whether backward decoding  
287 produces the same pattern of results as that yielded by the forward encoding  
288 approach described above. A similar cross-validation procedure was used as in the  
289 forward encoding approach, but accuracy was now defined as proportion correct  
290 accuracy of the presented orientation on the test trials. This analysis confirmed the  
291 results of the forward encoding: orientations shown in unexpected trials were

## Repetition suppression and prediction error

292 classified better than orientations shown in expected trials ( $p < .05$ ). Again, there was  
293 no effect of repetition on classification accuracy (paired t-test  $p > .05$ ).

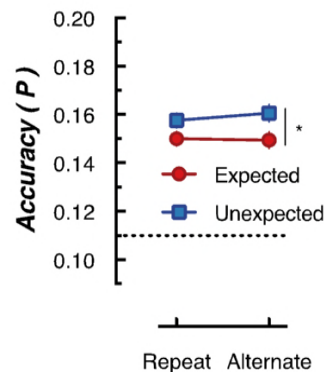

294

295 **Figure 5.** Peak linear discriminant classification accuracy of the presented grating  
296 orientation for expected and unexpected conditions. The dotted line indicates chance  
297 performance (1/9 orientations). The error bars indicate  $\pm 1$  standard error of the  
298 mean.

299

## 300 Prediction error affects the temporal stability of stimulus representations

301 Next, we examined whether repetition suppression and prediction error  
302 affected dynamic, ongoing stimulus representations by using cross-temporal  
303 generalization (Stokes et al., 2013; King et al., 2014; King and Dehaene, 2014;  
304 Myers et al., 2015; Spaak et al., 2017). To do this, we used the same forward  
305 encoding approach as in the previous analysis, but now the weights were derived  
306 from one time-point on one set of trials, and then applied at every time point in the  
307 test trials. Again, a cross-validation approach was used, with all trials serving as both  
308 training and test. This analysis examined whether the same spatial pattern of EEG  
309 activity that allows for orientation selectivity generalizes to other time points, thus  
310 revealing whether there was a stable or dynamic neural representation of the stimuli  
311 over time.

312 As shown in Figure 6, the best orientation selectivity was on-axis between 100  
313 ms and 300 ms after stimulus presentation, suggesting that the stimulus



## Repetition suppression and prediction error

314 representation changed dynamically over time (King and Dehaene, 2014). There  
315 was also significant off-axis orientation-selectivity from 100-500 ms after stimulus  
316 presentation, suggesting that some aspects of the neural representation of  
317 orientation were stable over time.

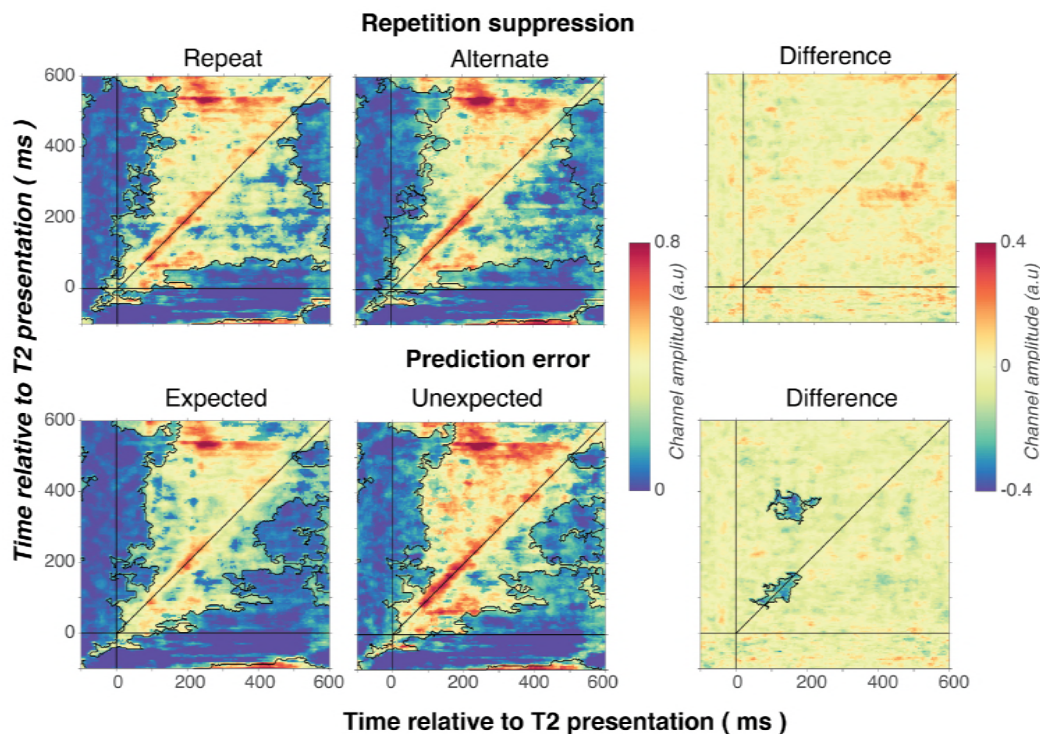

318  
319 **Figure 6.** Cross-temporal generalization of the forward encoding model based on T2  
320 orientations for the main effects of repetition suppression (upper panels) and  
321 prediction error (lower panels). The maps have been thresholded (indicated by  
322 opacity) to show clusters (black outlines) of significant orientation selectivity  
323 (permutation testing, cluster threshold  $p < .05$ , corrected cluster statistic  $p < .05$ ,  
324 5,000 permutations). The difference between the conditions is shown in the right-  
325 hand column (permutation testing, cluster threshold  $p < .05$ , corrected cluster  
326 statistic  $p < .05$ ). Opacity and outlines indicate significant differences.  
327

328 There was no effect of repetition suppression on the temporal generalization  
329 of orientation information (upper panels of Figure 6), suggesting that repetition  
330 suppression did not affect the temporal stability of neural representations of the  
331 Gabors. Examining the effect of prediction error on cross-temporal generalization  
332 confirmed that there was significantly more on-axis orientation selectivity when the  
333 stimulus was unexpected than when it was expected. This increased on-axis

## Repetition suppression and prediction error

334 orientation selectivity generalized off-axis at around 300-400 ms after stimulus onset.

335 This finding suggests that the same representation that is activated to process the

336 prediction error is reactivated later as the stimulus continues to be processed. Such

337 a signal could constitute the prior of the prediction, as this should be updated on the

338 basis of the incoming sensory evidence, which in turn would likely require

339 reactivation of the unexpected stimulus.

340 **Representation of the expected feature is activated even when it is not**

341 **presented**

342 In a final set of analyses, we investigated how prediction error signals affect

343 the interpretation of incoming sensory information, one of the key questions of

344 predictive coding theory (Rao and Ballard, 1999; Friston, 2005). To do this, we

345 focused on trials in which the orientation of the first Gabor within a pair did not match

346 the orientation of the second Gabor (i.e., the alternating trials), and examined the

347 EEG response to the second stimulus (see Figure 7). Here, we trained the forward

348 encoding model on the orientation of the Gabor that was actually presented (stimulus

349 driven), or on the orientation that was *expected* based on the first Gabor in the pair

350 (non-stimulus driven). We did not combine data across the repeat and alternating

351 conditions because the orientations were now different upon presentation of the

352 second Gabor in the pair.

## Repetition suppression and prediction error

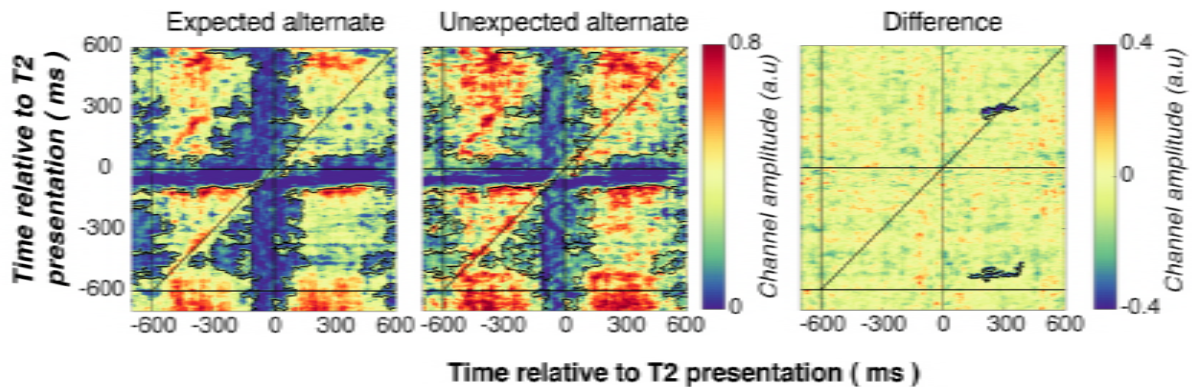

353  
354 **Figure 7.** Cross-temporal generalization of the forward encoding model for the  
355 orientations presented in T1 relative to the onset of T2 (T1 was presented at -600  
356 ms). The orientation in the T2 period is randomized but there are still periods for the  
357 unexpected alternation in which there is significant orientation selectivity. These  
358 maps have been thresholded (indicated by opacity) to show clusters (black outlines)  
359 of significant orientation selectivity (permutation testing, cluster threshold  $p < .05$ ,  
360 corrected cluster statistic  $p < .05$ , 5,000 permutations). The opacity in the right-hand  
361 column indicates areas of statistically significant difference between the two  
362 conditions (permutation testing ( $n = 5,000$ ), cluster threshold  $p < .05$ , corrected  
363 cluster statistic  $p < .05$ ).  
364  
365

366 In the case of unexpected alternation trials (central panel in Figure 7), the  
367 orientation presented in the first Gabor would be expected to repeat, so when a  
368 different orientation occurred as T2 this prediction had to be suppressed and the  
369 prior updated. Inspecting the plot for the difference between expected and  
370 unexpected trials (right panel in Figure 7) provides clues as to how this process  
371 might occur. As expected, for the time that T1 was presented there was significant  
372 on- and off-axis encoding for T1 orientation, with little difference between expectation  
373 conditions. More interestingly, in the unexpected alternation condition there was  
374 significantly better on-axis orientation selectivity for the T1 orientation between 150  
375 and 300 ms after the onset of T2, relative to the expected alternation condition  
376 (upper right quadrant of right panel in Figure 7). Furthermore, over the same time  
377 period, there was significantly better off-axis generalization of the T1 representation  
378 to the T2 epoch (lower right quadrant of right panel in Figure 7). This is confirmed by

## Repetition suppression and prediction error

379 the occurrence of significantly increased off-axis orientation selectivity between  
380 training time of -500 ms and +300 ms. The time course of this effect is consistent  
381 with our earlier findings, as the unexpected condition yielded better orientation  
382 selectivity for the presented (T2) orientation between 79 and 150 ms after the  
383 second Gabor presentation. An intriguing possibility is that the relevant neural  
384 circuits re-activate the representation of the expected stimulus when faced with  
385 unexpected sensory signals.

## 386 Discussion

387 Our findings demonstrate that repetition suppression and prediction error  
388 have distinct effects on neural representations of simple visual stimuli. We found that  
389 repetition suppression had no effect on orientation selectivity, even though the neural  
390 response to repeated stimuli was significantly decreased over occipital-parietal  
391 areas. Prediction error, on the other hand, significantly increased the amount of  
392 feature-selective information contained within patterns of EEG activity very soon  
393 after stimulus onset. This same early representation of the unexpected stimulus was  
394 reactivated at 200-300 ms after the initial neural response, supporting the idea that  
395 sensory prior expectations may be updated through comparison with the incoming  
396 sensory evidence.

397 The present work provides a significant advance in our understanding of how  
398 predictive coding allows the brain to process incoming sensory information by  
399 comparing what is expected with what actually occurs. Prediction errors have been  
400 extensively investigated using mismatch negativity protocols in which an unexpected  
401 stimulus causes a significantly larger response than an expected stimulus (Näätänen  
402 et al., 2007; Bekinschtein et al., 2009; Garrido et al., 2009). Typically, this increased

## Repetition suppression and prediction error

403 response to an unexpected stimulus has been attributed to the need to update the  
404 prediction based on sensory evidence (Garrido et al., 2009). However, our results  
405 suggest that the increased response may reflect two distinct processes that occur at  
406 separate times. Incoming sensory information is first evaluated against the prior  
407 (which occurs very early after stimulus presentation). Later, around 300 ms after  
408 stimulus presentation, this same representation is reactivated to update the  
409 expectation against the initially predicted representation. The present work thus  
410 provides a novel insight into how predictive coding might change neural  
411 representations of sensory information.

412         Multivariate pattern classification methods have been widely used to examine  
413 BOLD activity (Kamitani and Tong, 2005; 2006; Kriegeskorte et al., 2008; Haxby et  
414 al., 2014), but have only recently been applied to EEG and MEG data (Garcia et al.,  
415 2013; King et al., 2013; 2014; King and Dehaene, 2014; Cichy et al., 2015; Myers et  
416 al., 2015; King et al., 2016; Wolff et al., 2017). These kinds of analyses permit non-  
417 invasive neuroimaging to move beyond the measurement of overall levels of neural  
418 activity, and instead to uncover subtle patterns of neural activity associated with  
419 specific stimuli or task demands, and which are more directly comparable with those  
420 obtained from invasive neurophysiological recordings of neuronal activity (Kamitani  
421 and Tong, 2006; Doeller et al., 2010; Sprague and Serences, 2013; Constantinescu  
422 et al., 2016). Such model-based approaches are especially appealing since changes  
423 in overall activity levels could be consistent with many different changes in the nature  
424 of the underlying neural representation. For instance, sharpening and gain reduction  
425 could both reduce the magnitude of the overall neural response but cause very  
426 different effects on the amount of information conveyed by those representations.

## Repetition suppression and prediction error

427 Surprisingly few studies have used invasive recording methods to examine  
428 how predictive coding affects stimulus representations at the neuronal level. One  
429 study in macaques (Kaliukhovich and Vogels, 2010) used the same design as  
430 Summerfield and colleagues but found no attenuation of repetition suppression by  
431 expectation on spiking and local field potentials in inferior temporal cortex when  
432 using high-level objects as stimuli (fractals and real-world objects). A later fMRI study  
433 in humans (Kovács et al., 2013), used a similar stimulus set and also found no  
434 attenuation of repetition suppression by expectation in the same cortical region. A  
435 follow-up study explained the apparent conflict finding that the attenuation effects of  
436 repetition suppression are only found with familiar but not unfamiliar stimuli (Grotheer  
437 and Kovács, 2014). Taken together, these results potentially suggests that the  
438 stimulus sets used by (2010) were sufficiently unfamiliar to the animals to induce  
439 expectation effects on repetition suppression.

440 Some other work has, however, found that context plays a large role in  
441 determining the magnitude of single neuron responses, with rare stimuli generating  
442 significantly larger responses than more commonly-occurring stimuli (Ulanovsky et  
443 al., 2003). This result has been considered a single-neuron equivalent of the  
444 mismatch negativity, but the design did not control for adaptation effects, thus  
445 making it difficult to draw an unambiguous comparison with the current work. A more  
446 recent study found that neurons in mouse visual cortex show a large response when  
447 task-irrelevant visual stimuli presented during training were omitted, suggesting a  
448 strong expectation had been violated (Fiser et al., 2016). This result is consistent  
449 with the literature on the mismatch negativity, in which the omission of an expected  
450 stimulus results in a large prediction error (Garrido et al., 2009; Wacongne et al.,

## Repetition suppression and prediction error

451 2011). Future single-unit work characterising how response selectivity of neural  
452 populations is affected by prediction would help illuminate the neuronal  
453 underpinnings of expectation effects derived from non-invasive imaging in human  
454 observers.

455         Unlike the effects of prediction, there is a large body of electrophysiological  
456 work showing how adaptation affects neuronal stimulus representations across  
457 various sensory modalities in different species (Dragoi et al., 2000; Felsen et al.,  
458 2002; Kohn and Movshon, 2004; Patterson et al., 2013; Adibi et al., 2013a; 2013b).  
459 For instance, there is a sharpening of stimulus selectivity in MT neurons following 40  
460 s of adaptation to a drifting grating (Kohn and Movshon, 2004). As we have  
461 highlighted, however, prolonged adaptation is likely also associated with a significant  
462 prediction that the next stimulus will be the same as the previous one. Perhaps more  
463 relevant to the current results, the width of the orientation tuning in V1 is only  
464 marginally sharpened with brief (400 ms) adaptation (Patterson et al., 2013). Again,  
465 however, this latter work did not control for expectation, so it is impossible to  
466 determine the role of predictive coding in these results. Our result where repetition  
467 suppression did not affect the bandwidth of orientation selectivity measured using  
468 EEG is also consistent with models of orientation adaptation based on human  
469 psychophysical data, which suggest that adaptation does not affect the width of the  
470 adapted neurons (Clifford, 2002; Dickinson et al., 2010; Clifford, 2014; Tang et al.,  
471 2015; Dickinson et al., 2017).

472         We found that a prediction error increased the gain of early stimulus  
473 representations, but did not affect the sharpness of their tuning. This lack of  
474 sharpening is in contrast with the findings of a previous study (Kok et al., 2012), in

## Repetition suppression and prediction error

475 which a high-level prediction error led to ‘sharper’ multivariate decoding for expected  
476 versus unexpected visual stimuli. Kok and colleagues used an auditory tone to cue  
477 the orientation of a subsequent visual stimulus, and found significantly less off-label  
478 classification accuracy for predicted than for unpredicted stimuli. They concluded  
479 that predictions cause sharpening of stimulus representations. It is noteworthy,  
480 however, that in their study Kok et al. (2012) employed a ‘backward’ decoding  
481 analysis to quantify sharpness, rather than forward encoding as here, which might  
482 account for the discrepant findings. It has been argued that the forward encoding  
483 approach, which reconstructs feature representations, is more appropriate than  
484 decoding for determining how stimulus selectivity is changed (Cichy et al., 2015).  
485 Another possible reason for the different results relates to the manner in which  
486 predictions are generated within a task. Kok and colleagues generated predictions  
487 by pairing an auditory cue with a visual stimulus, whereas we exploited the  
488 properties of the visual stimuli themselves (i.e., their orientation) to generate  
489 predictions. An intriguing possibility is that combining predictions generated across  
490 distinct cortical areas (e.g., visual and auditory) leads to sharpening of tuning,  
491 whereas predictions generated within a single cortical area lead to gain modulation.

492 In summary, we have shown that repetition suppression and prediction error  
493 differentially affect the neural representation of simple, but fundamental, sensory  
494 features. Our results further highlight how the context in which a stimulus occurs, not  
495 just its features, affect the way it is represented by the brain. Our findings suggest  
496 encoding priority through increased gain may be given to unexpected events which  
497 could potentially speed responses. This prioritized representation is then re-activated  
498 at a later time period supporting the idea that the feedback from higher cortical areas



## Repetition suppression and prediction error

499 reactivates an initial sensory representation in early cortical areas.

### 500 **Method**

#### 501 **Participants**

502 A group of 15 healthy adult volunteers (9 females, median age = 20.5 yr,  
503 range = 18 to 37 yr) participated in exchange for partial course credit or financial  
504 reimbursement (AUD\$20/hr). We based our sample size based on work that  
505 investigated the interaction between repetition suppression and predictive error (N =  
506 16; Summerfield et al., 2008) and that used forward encoding modelling to  
507 investigate orientation selectivity using MEEG with a comparable number of trials as  
508 the current study (N =10; Myers et al., 2015). Each person provided written informed  
509 consent prior to participation, and had normal or corrected-to-normal vision. The  
510 study was approved by The University of Queensland Human Research Ethics  
511 Committee and was in accordance with the Declaration of Helsinki.

#### 512 **Experimental setup**

513 The experiment was conducted inside a dimly illuminated room with the  
514 participants seated in a comfortable chair. The stimuli were displayed on a 22-inch  
515 LED monitor (resolution 1920 x 1080 pixels, refresh rate 120 Hz) using the  
516 PsychToolbox presentation software (Brainard, 1997; Pelli, 1997) for MATLAB  
517 (v7.3). Viewing distance was maintained at 45 cm using a chinrest, meaning the  
518 screen subtended  $61.18^\circ \times 36.87^\circ$  (each pixel  $2.4' \times 2.4'$ ).

#### 519 **Task**

520 The stimuli were Gabors (diameter:  $5^\circ$ , spatial frequency:  $2 \text{ c}/^\circ$ , 100%  
521 contrast) presented centrally in pairs for 100 ms, separated by 500 ms (600 ms  
522 stimulus onset asynchrony) with a variable (650 to 750 ms) inter-stimulus interval

## Repetition suppression and prediction error

523 between trials. Across the trials, the orientations of the Gabors were evenly spaced  
524 between 0° and 160° (in 20° steps) so we could reconstruct orientation selectivity  
525 contained within the EEG response using forward encoding modelling. The  
526 relationship of the orientations of the pairs Gabors was also used to construct the  
527 different repetition suppression and prediction conditions. The orientation presented  
528 in the second Gabor in the pair could either repeat or alternate with respect to the  
529 orientation of the first Gabor. In the alternation trials, the orientation of the first Gabor  
530 was drawn randomly, without replacement, from an even distribution of orientations  
531 that was different to the orientation of the second Gabor. To vary the degree of  
532 prediction, in half of the blocks 80% of the trials had repeated orientations and 20%  
533 of the trials had alternating orientations, whereas in the other half of the blocks these  
534 contingencies were reversed. This design allowed us to separately examine the  
535 effects of repetition suppression and prediction because of the orthogonal nature of  
536 the blocked design. The blocks of 135 trials (~3 mins) switched between the  
537 expectation of a repeating or alternating pattern, with the starting condition  
538 counterbalanced across participants.

539         The participants' task was to monitor the stream for rare, faintly coloured red  
540 or green Gabors, and to discriminate the colour as quickly and accurately as  
541 possible. Any trial with a coloured target was excluded from analysis. The orientation  
542 match between the pairs was made to be consistent with the dominant contingency  
543 (i.e., repeated or alternating) within that block. Pilot testing was used prior to the  
544 main experiment to set the task at approximately threshold, to ensure that  
545 participants focused exclusively on the colour-discrimination task rather than the  
546 orientation contingencies associated with prediction and repetition. Only one

## Repetition suppression and prediction error

547 participant reported being aware of the changing stimulus contingencies across the  
548 blocks when asked at the end of the experiment. Self-paced breaks were provided  
549 between each of the 20 blocks within a session, at which time feedback was  
550 provided on performance in the preceding block. Each participant completed two  
551 sessions of 2700 trials each (5400 trials in total), with each session lasting around 70  
552 mins of experimental time and 45 mins of EEG setup.

### 553 EEG acquisition and pre-processing

554 Continuous EEG data were recorded using a BioSemi Active Two system  
555 (BioSemi, Amsterdam, Netherlands). The signal was digitised at 1024 Hz sampling  
556 rate with a 24-bit A/D conversion. The 64 active scalp Ag/AgCl electrodes were  
557 arranged according to the international standard 10–20 system for electrode  
558 placement (Oostenveld and Praamstra, 2001) using a nylon head cap. As per  
559 BioSemi system design, the common mode sense and driven right leg electrodes  
560 served as the ground, and all scalp electrodes were referenced to the common mode  
561 sense during recording.

562 Offline EEG pre-processing was performed using EEGLAB in accordance with  
563 best practice procedures (Keil et al., 2014; Bigdely-Shamlo et al., 2015). The data  
564 were initially down sampled to 256 Hz and subjected to a 0.5 Hz high-pass filter to  
565 remove slow baseline drifts. Electrical line noise was removed using the  
566 *clean\_line.m*, and *clean\_rawdata.m* in EEGLAB (Delorme and Makeig, 2004) was  
567 used remove bad channels (identified using Artifact Subspace Reconstruction),  
568 which were then interpolated from the neighbouring electrodes. Data were then re-  
569 referenced to the common average before being epoched into segments around  
570 each stimulus pair (-0.5 s to 1.25 s from the first stimulus in the pair). Systematic

## Repetition suppression and prediction error

571 artefacts from eye blinks, movements and muscle activity were identified using semi-  
572 automated procedures in the SASICA toolbox (Chaumon et al., 2015) and regressed  
573 out of the signal. After this stage, any trial with a peak voltage exceeding  $\pm 100 \mu V$   
574 was excluded from the analysis. The data were then baseline corrected to the  
575 average EEG activity from -100 to 0 ms before the presentation of the second Gabor  
576 pair.

### 577 **Design**

578 We used a modified version of a factorial design that has previously been  
579 used to separately examine the effects of repetition suppression and prediction error  
580 (Summerfield et al., 2008; Kaliukhovich and Vogels, 2010; Summerfield et al., 2011;  
581 Todorovic et al., 2011; Todorovic and de Lange, 2012; Kovács et al., 2013). By  
582 comparing the two repeat conditions with the two alternating conditions, we could  
583 examine repetition suppression while controlling for different levels of expectation.  
584 Conversely, by comparing across the expected and unexpected trials, we could  
585 examine prediction error while controlling for repetition suppression.

### 586 **Measuring orientation selectivity**

587 We used a forward encoding approach to estimate the amount of orientation-  
588 selective information contained in the EEG data at each time point of the trial. This  
589 approach differs from standard decoding approaches by modelling each presented  
590 orientation as a continuous variable of a set of tuned orientation-selective channels.  
591 The forward-encoding technique has been successfully used to reconstruct colour  
592 (Brouwer and Heeger, 2009) and spatial (Sprague and Serences, 2013) selectivity in  
593 fMRI data. More recently it has been extended to orientation (Garcia et al., 2013;  
594 Myers et al., 2015; Wolff et al., 2017) and space (Foster et al., 2016) encoding of

## Repetition suppression and prediction error

595 MEG and EEG data, which allows for far greater temporal resolution than fMRI.

596 We applied forward encoding modelling to determine how repetition  
597 suppression and prediction error affected orientation selectivity. To do this, the  
598 second orientation in the Gabor pair in each trial was used to construct a regression  
599 matrix, with a separate regressor for the 9 orientations used across the experiment.  
600 This regression matrix was convolved with a set of basis functions (half cosines  
601 raised to the 8<sup>th</sup> power, which allowed complete and unbiased coverage of  
602 orientation space) to allow us to pool similar information patterns across nearby  
603 orientations (Brouwer and Heeger, 2009). We used this tuned regression matrix to  
604 estimate time-resolved orientation selectivity contained within the EEG activity in a  
605 16 ms sliding window, in 4 ms steps (Myers et al., 2015). To avoid overfitting, we  
606 used a cross-validation procedure where the regression weights were estimated for  
607 a training set and applied to an independent test set. This was done by solving the  
608 linear equation:

$$609 \quad B_1 = WC_1 \quad (1)$$

610 Where  $B_1$  (64 sensors x N training trials) is the electrode data for the training set,  $C_1$   
611 (9 channels x N training trials) is the tuned channel response across the training  
612 trials, and  $W$  is the weight matrix for the sensors we want to estimate (64 sensors x 9  
613 channels).  $W$  can be estimated using least square regression to solve equation (2):

$$614 \quad W = (C_1 C_1^T)^{-1} C_1^T B_1 \quad (2)$$

615 The channel response in the test set  $C_2$  (9 channels x N test trials) was estimated  
616 using the weights in (2) and applied to activity in  $B_2$  (64 sensors x N test trials).

$$617 \quad C^2 = (W W^T) W^T B^2 \quad (3)$$

618 We repeated this process by holding one trial out as test, and training on the

## Repetition suppression and prediction error

619 remaining trials until all trials had been used in test and training. The procedure was  
620 repeated for each trial within the trial epoch. We then shifted all trials to a common  
621 orientation, meaning that 0° corresponded to the orientation presented on each trial.

622 The reconstructed channel activations were separated into the four  
623 conditions, and averaged over the trials. These responses were then smoothed with  
624 a Gaussian kernel with a 16 ms window, and fit with a Gaussian function (4) using  
625 least square regression to quantify the amount of orientation selective activity.

$$626 \quad G(x) = A \exp\left(-\frac{(x-\varphi)^2}{2\sigma^2}\right) + C \quad (4)$$

627 Where  $A$  is the amplitude representing the amount of orientation selective activity,  $\varphi$   
628 is the orientation the function is centred on (in degrees),  $\sigma$  is the standard deviation  
629 (degrees) and  $C$  is a constant used to account for non-orientation selective baseline  
630 shifts.

## 631 Acknowledgements

632 CAS was supported by a scholarship from the Australian government. EA and JBM  
633 were supported by the Australian Research Council (ARC) Centre of Excellence for  
634 Integrative Brain Function (ARC Centre Grant CE140100007). EA was also  
635 supported by an ARC Discovery Project (DP170100908). JBM was also supported  
636 by an ARC Australian Laureate Fellowship (FL110100103).

## 637 References

- 638 Adibi M, Clifford CWG, Arabzadeh E (2013a) Informational basis of sensory  
639 adaptation: entropy and single-spike efficiency in rat barrel cortex. *J Neurosci*  
640 33:14921–14926.
- 641 Adibi M, McDonald JS, Clifford CWG, Arabzadeh E (2013b) Adaptation improves  
642 neural coding efficiency despite increasing correlations in variability. *J Neurosci*  
643 33:2108–2120.
- 644 Auksztulewicz R, Friston K (2016) Repetition suppression and its contextual

## Repetition suppression and prediction error

- 645           determinants in predictive coding. *Cortex* 80:125–140.
- 646   Barlow HB (2012) Possible Principles Underlying the Transformations of Sensory  
647       Messages. In: *Sensory Communication*, pp 216–234. The MIT Press.
- 648   Barron HC, Garvert MM, Behrens TEJ (2016) Repetition suppression: a means to  
649       index neural representations using BOLD? *Philos Trans R Soc Lond, B, Biol Sci*  
650       371:20150355.
- 651   Bekinschtein TA, Dehaene S, Rohaut B, Tadel F, Cohen L, Naccache L (2009)  
652       Neural signature of the conscious processing of auditory regularities.  
653       *Proceedings of the National Academy of Sciences* 106:1672–1677.
- 654   Benucci A, Saleem AB, Carandini M (2013) Adaptation maintains population  
655       homeostasis in primary visual cortex. *Nat Neurosci* 16:724–729.
- 656   Bigdely-Shamlo N, Mullen T, Kothe C, Su K-M, Robbins KA (2015) The PREP  
657       pipeline: standardized preprocessing for large-scale EEG analysis. *Front*  
658       *Neuroinform* 9:B153.
- 659   Brainard DH (1997) The Psychophysics Toolbox. *Spat Vis* 10:433–436.
- 660   Brouwer GJ, Heeger DJ (2009) Decoding and reconstructing color from responses in  
661       human visual cortex. *J Neurosci* 29:13992–14003.
- 662   Buckner RL, Goodman J, Burock M, Rotte M, Koutstaal W, Schacter D, Rosen B,  
663       Dale AM (1998) Functional-Anatomic Correlates of Object Priming in Humans  
664       Revealed by Rapid Presentation Event-Related fMRI. *Neuron* 20:285–296.
- 665   Chaumon M, Bishop DVM, Busch NA (2015) A practical guide to the selection of  
666       independent components of the electroencephalogram for artifact correction. *J*  
667       *Neurosci Meth* 250:47–63.
- 668   Cichy RM, Ramirez FM, Pantazis D (2015) Can visual information encoded in  
669       cortical columns be decoded from magnetoencephalography data in humans?  
670       *NeuroImage* 121:193–204.
- 671   Clifford CWG (2002) Perceptual adaptation: motion parallels orientation. *Trends*  
672       *Cogn Sci* 6:136–143.
- 673   Clifford CWG (2014) The tilt illusion: phenomenology and functional implications. *Vis*  
674       *Res* 104:3–11.
- 675   Constantinescu AO, O'Reilly JX, Behrens TEJ (2016) Organizing conceptual  
676       knowledge in humans with a gridlike code. *Science* 352:1464–1468.
- 677   Cui Y, Wang YV, Park SJH, Demb JB, Butts DA (2016) Divisive suppression  
678       explains high-precision firing and contrast adaptation in retinal ganglion cells.  
679       *eLife Sciences* 5.

## Repetition suppression and prediction error

- 680 Delorme A, Makeig S (2004) EEGLAB: an open source toolbox for analysis of single-  
681 trial EEG dynamics including independent component analysis. *J Neurosci Meth*  
682 134:9–21.
- 683 Dickinson JE, Almeida RA, Bell J, Badcock DR (2010) Global shape aftereffects  
684 have a local substrate: A tilt aftereffect field. *J Vis* 10:5–5.
- 685 Dickinson JE, Morgan SK, Tang MF, Badcock DR (2017) Separate banks of  
686 information channels encode size and aspect ratio. *J Vis* 17:27.
- 687 Diederer KMJ, Spencer T, Vestergaard MD, Fletcher PC, Schultz W (2016) Adaptive  
688 Prediction Error Coding in the Human Midbrain and Striatum Facilitates  
689 Behavioral Adaptation and Learning Efficiency. *Neuron* 90:1127–1138.
- 690 Doeller CF, Barry C, Burgess N (2010) Evidence for grid cells in a human memory  
691 network. *Nature* 463:657–661.
- 692 Dragoi V, Sharma J, Sur M (2000) Adaptation-Induced Plasticity of Orientation  
693 Tuning in Adult Visual Cortex. *Neuron* 28:287–298.
- 694 Felsen G, Shen Y-S, Yao H, Spor G, Li C, Dan Y (2002) Dynamic Modification of  
695 Cortical Orientation Tuning Mediated by Recurrent Connections. *Neuron* 36:945–  
696 954.
- 697 Fiser A, Mahringer D, Oyibo HK, Petersen AV, Leinweber M, Keller GB (2016)  
698 Experience-dependent spatial expectations in mouse visual cortex. *Nat Neurosci*  
699 19:1658–1664.
- 700 Foster JJ, Sutterer DW, Serences JT, Vogel EK, Awh E (2016) The topography of  
701 alpha-band activity tracks the content of spatial working memory. *J Neurophysiol*  
702 115:168–177.
- 703 Friston K (2005) A theory of cortical responses. *Philosophical Transactions of the*  
704 *Royal Society of London B: Biological Sciences* 360:815–836.
- 705 Garcia JO, Srinivasan R, Serences JT (2013) Near-real-time feature-selective  
706 modulations in human cortex. *Current Biology* 23:515–522.
- 707 Garrido MI, Kilner JM, Stephan KE, Friston KJ (2009) The mismatch negativity: A  
708 review of underlying mechanisms. *Clinical Neurophysiology* 120:453–463.
- 709 Gotts SJ, Chow CC, Martin A (2012) Repetition priming and repetition suppression:  
710 A case for enhanced efficiency through neural synchronization. *Cogn Neurosci*.
- 711 Gross CG, Schiller PH, Wells C, Gerstein GL (1967) Single-unit activity in temporal  
712 association cortex of the monkey. *J Neurophysiol* 30:833–843.
- 713 Grotheer M, Kovács G (2014) Repetition probability effects depend on prior  
714 experiences. *J Neurosci* 34:6640–6646.



## Repetition suppression and prediction error

- 715 Haxby JV, Connolly AC, Guntupalli JS (2014) Decoding neural representational  
716 spaces using multivariate pattern analysis. *Annu Rev Neurosci* 37:435–456.
- 717 Henson RNA, Rugg MD (2003) Neural response suppression, haemodynamic  
718 repetition effects, and behavioural priming. *Neuropsychologia* 41:263–270.
- 719 Kaliukhovich DA, Vogels R (2010) Stimulus Repetition Probability Does Not Affect  
720 Repetition Suppression in Macaque Inferior Temporal Cortex. *Cereb Cortex*  
721 21:1547–1558.
- 722 Kamitani Y, Tong F (2005) Decoding the visual and subjective contents of the human  
723 brain. *Nat Neurosci* 8:679–685.
- 724 Kamitani Y, Tong F (2006) Decoding seen and attended motion directions from  
725 activity in the human visual cortex. *Current Biology* 16:1096–1102.
- 726 Kay KN, Naselaris T, Prenger RJ, Gallant JL (2008) Identifying natural images from  
727 human brain activity. *Nature* 452:352–355.
- 728 Keil A, Debener S, Gratton G, Junghöfer M, Kappenman ES, Luck SJ, Luu P, Miller  
729 GA, Yee CM (2014) Committee report: Publication guidelines and  
730 recommendations for studies using electroencephalography and  
731 magnetoencephalography. *Psychophysiology* 51:1–21.
- 732 Keller AJ, Houlton R, Kampa BM, Lesica NA, Mries-Flogel TD, Keller GB, Helmchen  
733 F (2017) Stimulus relevance modulates contrast adaptation in visual cortex. *eLife*  
734 *Sciences* 6:e21589.
- 735 King J-R, Gramfort A, Schurger A, Naccache L, Dehaene S (2014) Two Distinct  
736 Dynamic Modes Subtend the Detection of Unexpected Sounds Kiebel S, ed.  
737 *PLoS ONE* 9:e85791.
- 738 King J-R, Pescetelli N, Dehaene S (2016) Brain Mechanisms Underlying the Brief  
739 Maintenance of Seen and Unseen Sensory Information. *Neuron* 92:1122–1134.
- 740 King JR, Dehaene S (2014) Characterizing the dynamics of mental representations:  
741 the temporal generalization method. *Trends Cogn Sci* 18:203–210.
- 742 King JR, Faugeras F, Gramfort A, Schurger A, Karoui El I, Sitt JD, Rohaut B,  
743 Wacongne C, Labyt E, Bekinschtein T, Cohen L, Naccache L, Dehaene S (2013)  
744 Single-trial decoding of auditory novelty responses facilitates the detection of  
745 residual consciousness. *NeuroImage* 83:726–738.
- 746 Kohn A, Movshon JA (2004) Adaptation changes the direction tuning of macaque MT  
747 neurons. *Nat Neurosci* 7:764–772.
- 748 Kok P, Jehee JFM, de Lange FP (2012) Less Is More: Expectation Sharpens  
749 Representations in the Primary Visual Cortex. *Neuron* 75:265–270.

## Repetition suppression and prediction error

- 750 Kourtzi Z, Kanwisher N (2001) Representation of Perceived Object Shape by the  
751 Human Lateral Occipital Complex. *Science* 293:1506–1509.
- 752 Kovács G, Kaiser D, Kaliukhovich DA, Vidnyánszky Z, Vogels R (2013) Repetition  
753 probability does not affect fMRI repetition suppression for objects. *J Neurosci*  
754 33:9805–9812.
- 755 Kriegeskorte N, Mur M, Ruff DA, Kiani R, Bodurka J, Esteky H, Tanaka K, Bandettini  
756 PA (2008) Matching Categorical Object Representations in Inferior Temporal  
757 Cortex of Man and Monkey. *Neuron* 60:1126–1141.
- 758 Larsson J, Smith AT (2012) fMRI repetition suppression: neuronal adaptation or  
759 stimulus expectation? *Cerebral Cortex* 22:567–576.
- 760 Maravall M, Petersen RS, Fairhall AL, Arabzadeh E, Diamond ME (2007) Shifts in  
761 Coding Properties and Maintenance of Information Transmission during  
762 Adaptation in Barrel Cortex Ebner FF, ed. *PLoS Biol* 5:e19.
- 763 Movshon JA, Lennie P (1979) Pattern-selective adaptation in visual cortical  
764 neurones. *Nature* 278:850–852.
- 765 Myers NE, Rohenkohl G, Wyart V, Woolrich MW, Nobre AC, Stokes MG, Frank MJ  
766 (2015) Testing sensory evidence against mnemonic templates. *eLife Sciences*  
767 4:e09000.
- 768 Näätänen R, Paavilainen P, Rinne T, Alho K (2007) The mismatch negativity (MMN)  
769 in basic research of central auditory processing: A review. *Clinical*  
770 *Neurophysiology* 118:2544–2590.
- 771 Oostenveld R, Praamstra P (2001) The five percent electrode system for high-  
772 resolution EEG and ERP measurements. *Clinical Neurophysiology* 112:713–719.
- 773 Patterson CA, Wissig SC, Kohn A (2013) Distinct Effects of Brief and Prolonged  
774 Adaptation on Orientation Tuning in Primary Visual Cortex. *J Neurosci* 33:532–  
775 543.
- 776 Pelli DG (1997) The VideoToolbox software for visual psychophysics: Transforming  
777 numbers into movies. *Spat Vis* 10:437–442.
- 778 Rao RPN, Ballard DH (1999) Predictive coding in the visual cortex: a functional  
779 interpretation of some extra-classical receptive-field effects. *Nat Neurosci* 2:79–  
780 87.
- 781 Rasmussen RG, Schwartz A, Chase SM (2017) Dynamic range adaptation in  
782 primary motor cortical populations. *eLife Sciences* 6:e21409.
- 783 Rentzeperis I, Nikolaev AR, Kiper DC, Van Leeuwen C (2012) Relationship between  
784 neural response and adaptation selectivity to form and color: an ERP study.  
785 *Front Hum Neurosci* 6.

## Repetition suppression and prediction error

- 786 Salti M, Monto S, Charles L, King J-R, Parkkonen L, Dehaene S, Johansen-Berg H  
787 (2015) Distinct cortical codes and temporal dynamics for conscious and  
788 unconscious percepts Johansen-Berg H, ed. *eLife Sciences* 4:e05652.
- 789 Schacter DL, Buckner RL (1998) Priming and the Brain. *Neuron* 20:185–195.
- 790 Spaak E, Watanabe K, Funahashi S, Stokes MG (2017) Stable and Dynamic Coding  
791 for Working Memory in Primate Prefrontal Cortex. *J Neurosci* 37:6503–6516.
- 792 Sprague TC, Serences JT (2013) Attention modulates spatial priority maps in the  
793 human occipital, parietal and frontal cortices. *Nat Neurosci* 16:1879–1887.
- 794 Stokes MG, Kusunoki M, Sigala N, Nili H, Gaffan D, Duncan J (2013) Dynamic  
795 Coding for Cognitive Control in Prefrontal Cortex. *Neuron* 78:364–375.
- 796 Summerfield C, Trittschuh EH, Monti JM, Mesulam MM, Eger T (2008) Neural  
797 repetition suppression reflects fulfilled perceptual expectations. *Nat Neurosci*  
798 11:1004–1006.
- 799 Summerfield C, Wyart V, Mareike Johnen V, de Gardelle V (2011) Human Scalp  
800 Electroencephalography Reveals that Repetition Suppression Varies with  
801 Expectation. *Front Hum Neurosci* 5.
- 802 Tang MF, Dickinson JE, Visser TAW, Badcock DR (2015) The broad orientation  
803 dependence of the motion streak aftereffect reveals interactions between form  
804 and motion neurons. *J Vis* 15:4.
- 805 Todorovic A, de Lange FP (2012) Repetition suppression and expectation  
806 suppression are dissociable in time in early auditory evoked fields. *J Neurosci*  
807 32:13389–13395.
- 808 Todorovic A, van Ede F, Maris E, de Lange FP (2011) Prior Expectation Mediates  
809 Neural Adaptation to Repeated Sounds in the Auditory Cortex: An MEG Study. *J*  
810 *Neurosci* 31:9118–9123.
- 811 Tootell R, Reppas JB, Dale AM, Look RB (1995) Visual motion aftereffect in human  
812 cortical area MT revealed by functional magnetic resonance imaging. *Nature*.
- 813 Tootell RB, Hadjikhani NK, Vanduffel W, Liu AK, Mendola JD, Sereno MI, Dale AM  
814 (1998) Functional analysis of primary visual cortex (V1) in humans. *Proc Natl*  
815 *Acad Sci USA* 95:811–817.
- 816 Ulanovsky N, Las L, Nelken I (2003) Processing of low-probability sounds by cortical  
817 neurons. *Nat Neurosci* 6:391–398.
- 818 Wacongne C, Labyt E, van Wassenhove V, Bekinschtein T, Naccache L, Dehaene S  
819 (2011) Evidence for a hierarchy of predictions and prediction errors in human  
820 cortex. *Proc Natl Acad Sci USA* 108:20754–20759.

## Repetition suppression and prediction error

821 Wolff MJ, Jochim J, Akyürek EG, Stokes MG (2017) Dynamic hidden states  
822 underlying working-memory-guided behavior. *Nat Neurosci* 20:864–871.  
823
